# Supplementary material
Source: HighWire-hosted journal article supplement (https://ajnr.org/content/suppl/2014/05/22/ajnr.A3950)
Supplement: 3950_materials.pdf [file 3950_materials.pdf]

**ON-LINE APPENDIX**

**Patient ID:** \_\_\_\_\_

**Total Score:** \_\_\_\_\_

**Radiological appearance:**

**Vascular infarct**      **Prematurity (PVL/ IVH/ combined)**      **Congenital malformation**      **Other**

**Affected Hemisphere:**    **Right**      **Left**      **Bilateral**

**Involved lobes (0-no involvement, 1- involvement)**

**Frontal**      0    1

**Parietal**      0    1

**Temporal**      0    1

**Occipital**      0    1

**White matter:**

**Gliososis**              0    1

**Cystic changes**      0    1

**White matter volume loss (in comparison to contra lateral side)**

**No volume loss**                      0

**Mild volume loss (< 40%)**      1

**Moderate volume loss (40-59%)** 2

**Severe volume loss (> 60%)**    3

**Cortical Grey matter pathology:**    0    1

**Deep grey Matter pathology:**

**Caudate**              0    1

**Putamen**              0    1

**Globus pallidus**      0    1

**Thalamus**              0    1

**White matter tracts disrupted:**

**External capsule**    0    1

**Internal capsule anterior limb**    0    1

**Internal capsule posterior limb**    0    1

**Pyramids**      0    1

Radiological score evaluation form. If bilateral injury is present, assessment should be performed for each hemisphere separately.

**On-line Table: Subject characteristics**

| Sub | Sex | Term/Preterm<br>(GA in Weeks) | Age at MRI  | Hemiparetic<br>Side | Type of Injury <sup>a</sup>                               | MACS | GMFCS | Radiologic<br>Score <sup>b</sup> |
|-----|-----|-------------------------------|-------------|---------------------|-----------------------------------------------------------|------|-------|----------------------------------|
| 1   | M   | Term                          | 8 y, 6 mo   | R                   | Intracranial hemorrhage                                   | 3    | 2     | 18                               |
| 2   | F   | Preterm-31                    | 13 y        | R                   | IVH                                                       | 2    | 2     | 9                                |
| 3   | F   | Preterm-26                    | 14 y, 3 mo  | R                   | IVH                                                       | 2    | 2     | 5                                |
| 4   | M   | Term                          | 9 y, 2 mo   | R                   | MCA infarct                                               | 2    | 2     | 10                               |
| 5   | M   | Term                          | 7 y, 2 mo   | R                   | MCA infarct                                               | 3    | 2     | 15                               |
| 6   | M   | Preterm-27                    | 10 y, 2 mo  | L                   | PVL                                                       | 1    | 1     | 7                                |
| 7   | F   | Preterm-26                    | 14 y        | R                   | IVH                                                       | 3    | 2     | 18                               |
| 8   | M   | Term                          | 14 y, 1 mo  | R                   | MCA infarct                                               | 1    | 2     | 5                                |
| 9   | M   | Preterm-29                    | 7 y, 2 mo   | L                   | PVL + focal infarct                                       | 1    | 1     | 7                                |
| 10  | F   | Term                          | 7 y, 3 mo   | R                   | MCA infarct                                               | 2    | 1     | 17                               |
| 11  | F   | Term                          | 10 y, 2 mo  | R                   | MCA infarct                                               | 1    | 1     | 7                                |
| 12  | M   | Preterm-32                    | 9 y, 2 mo   | R                   | IVH                                                       | 2    | 2     | 13                               |
| 13  | M   | Term                          | 7 y, 2 mo   | R                   | MCA infarct                                               | 3    | 2     | 13                               |
| 14  | F   | Term                          | 13 y        | L                   | Intracranial hemorrhage resulting<br>from TBI at 3 mo     | 2    | 2     | 13                               |
| 15  | M   | Preterm-34                    | 15 y        | L                   | IVH/PVL                                                   | 2    | 1     | 15                               |
| 16  | M   | Term                          | 13 y        | R                   | Infarct at 2.5 y                                          | 3    | 2     | 18                               |
| 17  | F   | Unknown due to<br>adoption    | 16 y        | R                   | Vascular infarct                                          | 1    | 1     | 13                               |
| 18  | F   | Term                          | 18 y, 8 mo  | R                   | CVA at 7.5 y                                              | 2    | 1     | 15                               |
| 19  | F   | Term                          | 7 y, 6 mo   | L                   | Intracranial hemorrhage after<br>cardiac surgery at 18 mo | 2    | 2     | 15                               |
| 20  | F   | Term                          | 9 y, 11 mo  | L                   | CM: polymicrogyry                                         | 2    | 2     | 7                                |
| 21  | M   | Term                          | 8 y         | R                   | MCA infarct                                               | 1    | 1     | 8                                |
| 22  | M   | Term                          | 11 y, 10 mo | R                   | Vascular infarct                                          | 3    | 2     | 17                               |
| 23  | M   | Term                          | 15 y, 9 mo  | L                   | CM: polymicrogyry                                         | 2    | 1     | 7                                |
| 24  | M   | Term                          | 8 y, 6 mo   | R                   | PVL                                                       | 1    | 1     | 8                                |
| 25  | F   | Term                          | 10 y, 9 mo  | R                   | PVL + focal infarct                                       | 1    | 1     | 4                                |
| 26  | F   | Term                          | 13 y, 2 mo  | L                   | CM: polymicrogyry                                         | 2    | 2     | 9                                |
| 27  | M   | Term                          | 8 y, 3 mo   | R                   | PVL + multifocal WM changes                               | 3    | 2     | 12 (9 left, 3 right)             |

**Note:**—IVH indicates intraventricular hemorrhage; PVL, periventricular leukomalacia; TBI, traumatic brain injury; CVA, cerebrovascular accident; CM, congenital malformation;

Sub, subject; GA, gestational age; R, right; L, left.

<sup>a</sup> If time of injury not stated, injury was perinatal.

<sup>b</sup> Mean of 3 ratings from 2 radiologists.
